# Supplementary material for: GSNOR provides plant tolerance to iron toxicity via preventing iron-dependent nitrosative and oxidative cytotoxicity
Source: PubMed Central journal article supplement (PMC6715714; doi:10.1038/s41467-019-11892-5), 2019-08-29
Supplement: 41467_2019_11892_MOESM1_ESM.pdf [file 41467_2019_11892_MOESM1_ESM.pdf]

1  
2  
3  
4  
5  
6  
7

**GSNOR provides plant tolerance to iron toxicity via preventing iron-dependent nitrosative and oxidative cytotoxicity**

*Li et al.*

1

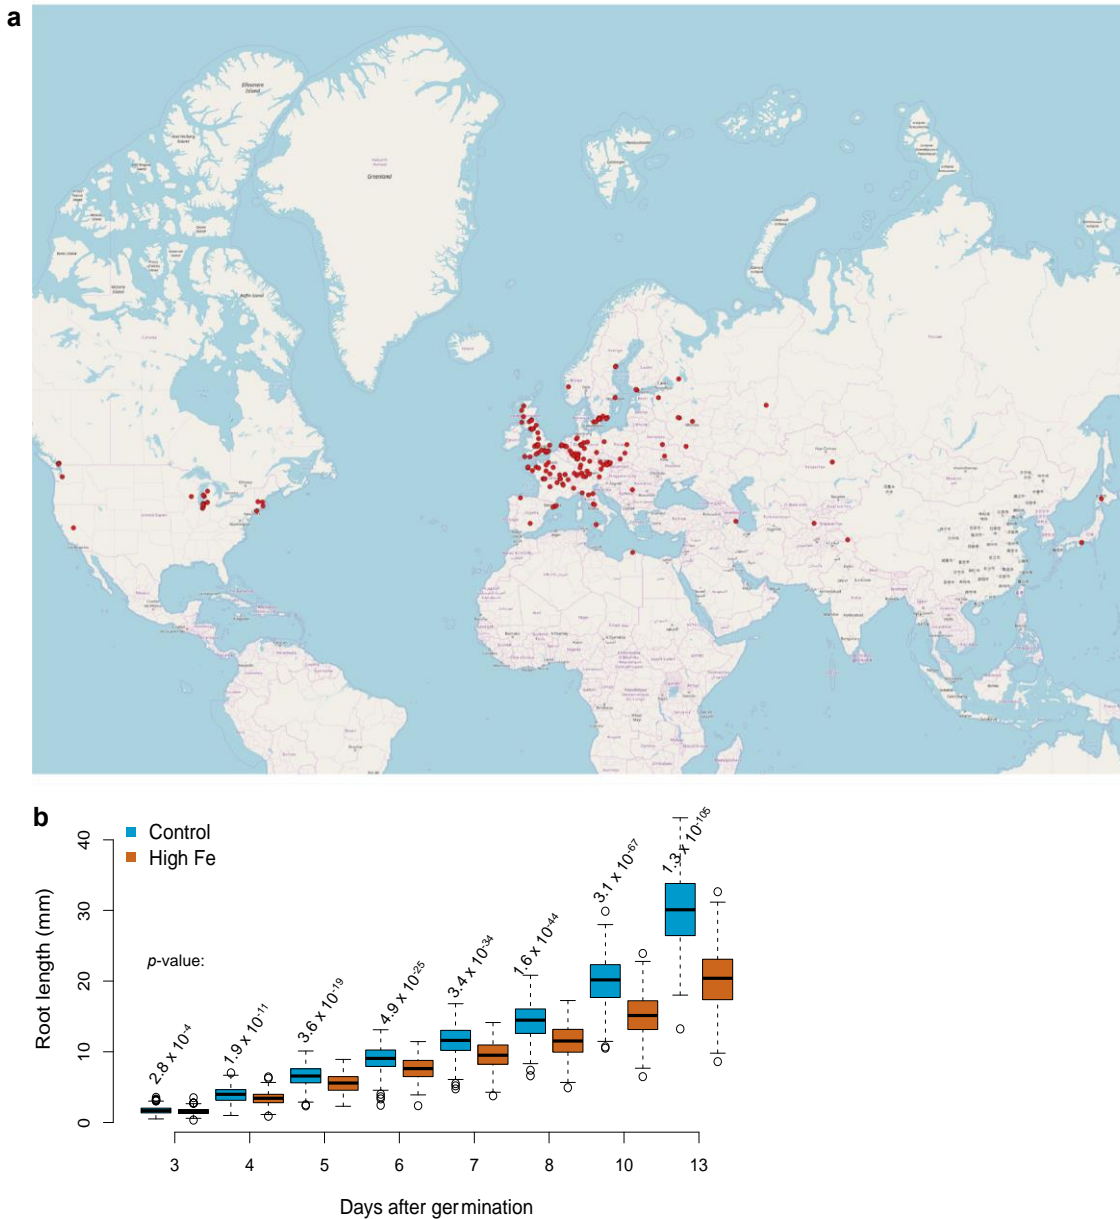

2

3 **Supplementary Figure 1. Natural variation of root growth responses to high Fe in *Arabidopsis*.** a,

4 Geographic distribution of 319 accessions of *Arabidopsis thaliana* used in this study. Map is plotted using

5 data available under the Open Database License © OpenStreetMap

6 (<http://www.openstreetmap.org/copyright>). b, Box plots for the primary root length of 319 *Arabidopsis*

7 accessions under control and high Fe (350µM) conditions. P-value of Student's t-test for comparing

8 growth in control and high Fe for each time point is indicated in figure. The source data of Supplementary

9 Figure 1a are provided in a Source Data file.

10

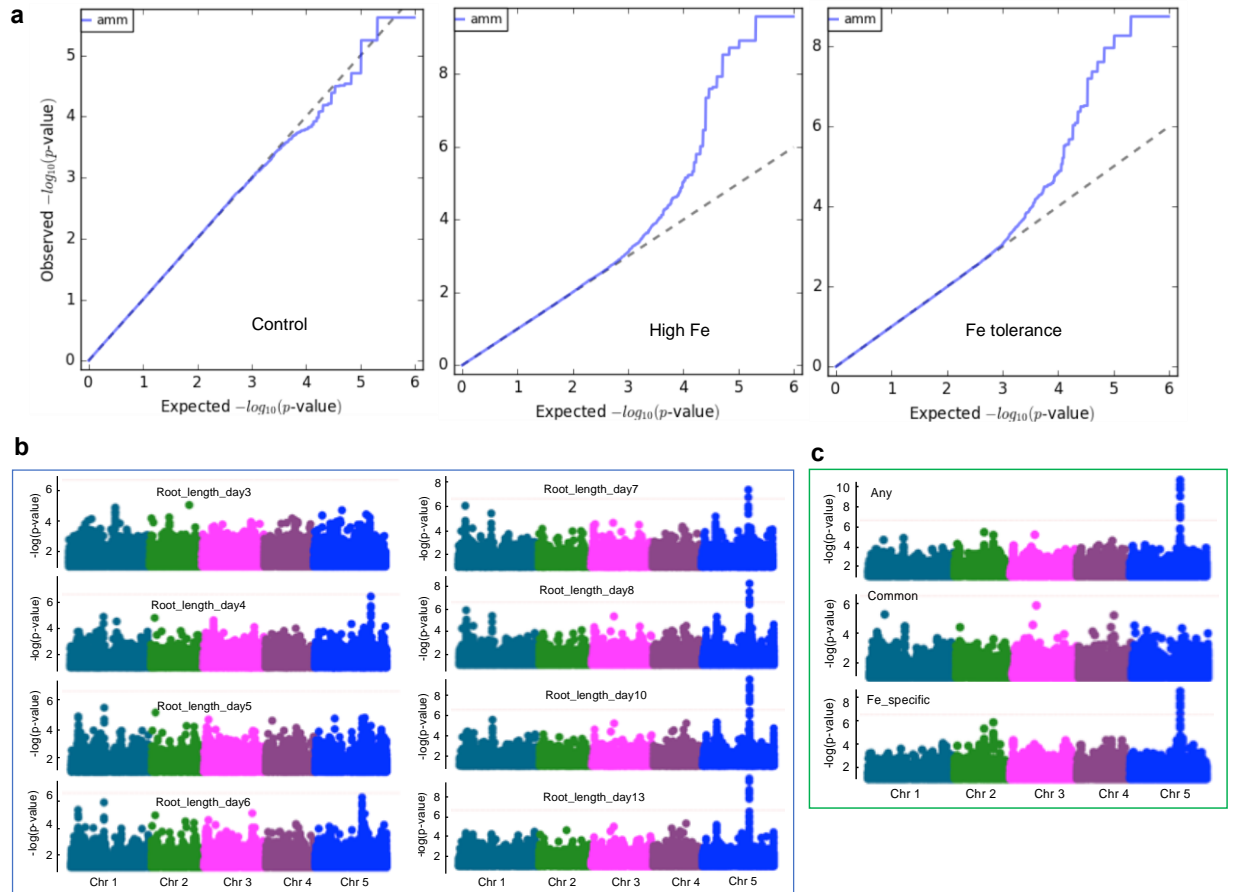

1  
 2 **Supplementary Figure 2. Genome-wide association studies of root growth responses to high Fe in**  
 3 ***Arabidopsis*.** **a**, Quantile-quantile (QQ) plots of GWAS analysis in Fig. 1B. **b**, Manhattan plots of GWAS  
 4 analyses using the primary root length in high Fe from day3 to day13 after germination. **c**, Manhattan  
 5 plots for multi-trait GWAS analysis for high-Fe dependent primary root length at day10.  
 6

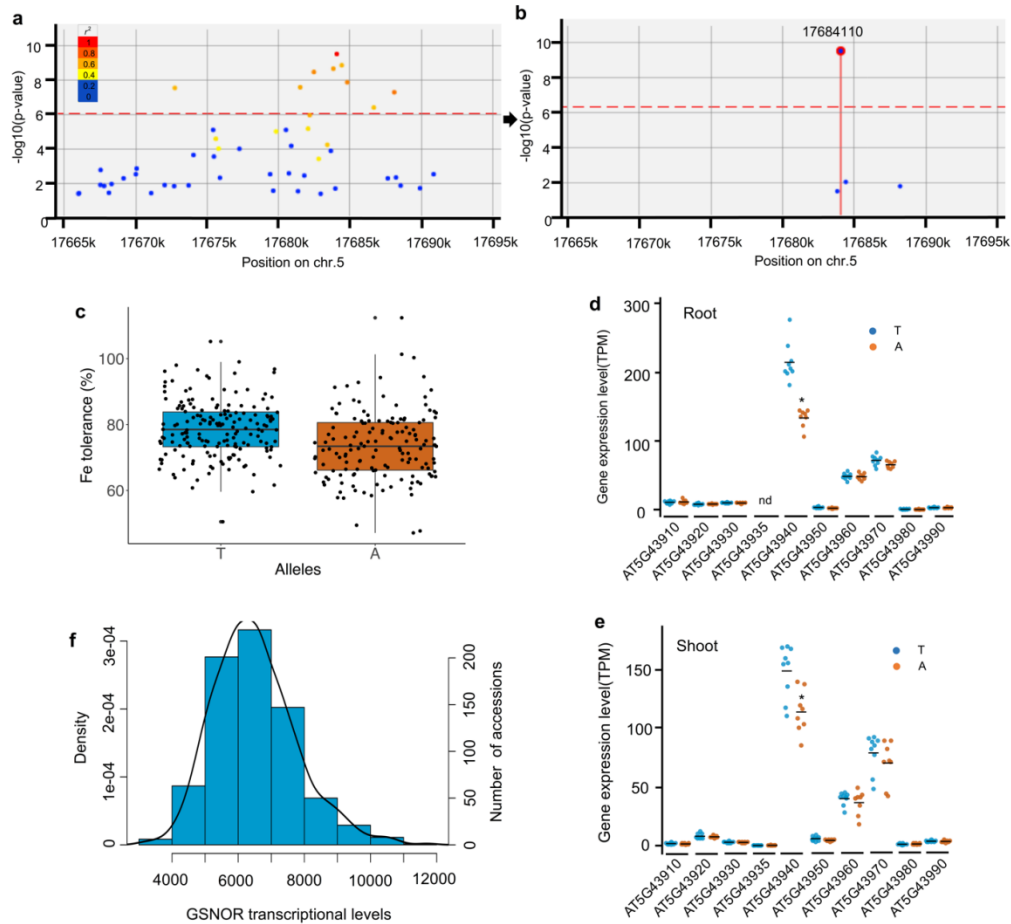

1  
2  
3 **Supplementary Figure 3. Analysis of top SNPs identified by GWAS for root length in high Fe. a,**  
4 Linkage Disequilibrium (LD) analysis of the lead SNP identified by GWAS at high Fe in Fig. 1B. GWAS  
5  $-\log_{10}(p\text{-value})$  of SNPs shown on y axis, while chromosome position of SNPs shown on x axis. The  
6 square of the correlation coefficient ( $r^2$ ) between different SNPs are shown in different colors. **b,**  
7 Conditional GWAS analysis with the lead SNP indicated in (a). The position of lead SNP shown in figure.  
8 **c,** Box plot of Fe tolerance at day10 grouped by the two variants of the top SNP. Each dot shows a  
9 phenotype value of an accession. n = 171 and 148 accessions for allele T and A, respectively. **d, e,** Dot  
10 plots and the mean of expression levels of the ten genes surrounding the lead SNP in roots (**d**) and shoots  
11 (**e**) of 17 *Arabidopsis* accessions grouped by the two variants of the lead SNP (resistant allele T (n = 9  
12 accessions) and sensitive allele A (n = 8 accessions)). Asterisk (\*) indicates the significant difference by  
13 Student's *t*-test at  $p\text{-value} < 0.05$ . Data from (<https://www.ebi.ac.uk/arrayexpress/experiments/E-GEOD-53197>). **f,** Histogram and density curve of GSNOR transcript level in the shoots of 665 *Arabidopsis*  
14 accessions. Data was derived from 1001 *Arabidopsis* genomes transcriptome datasets<sup>27</sup>. GSNOR is  
15 encoded by At5g43940. The source data of Supplementary Figure 3c-f are provided as a Source Data file.



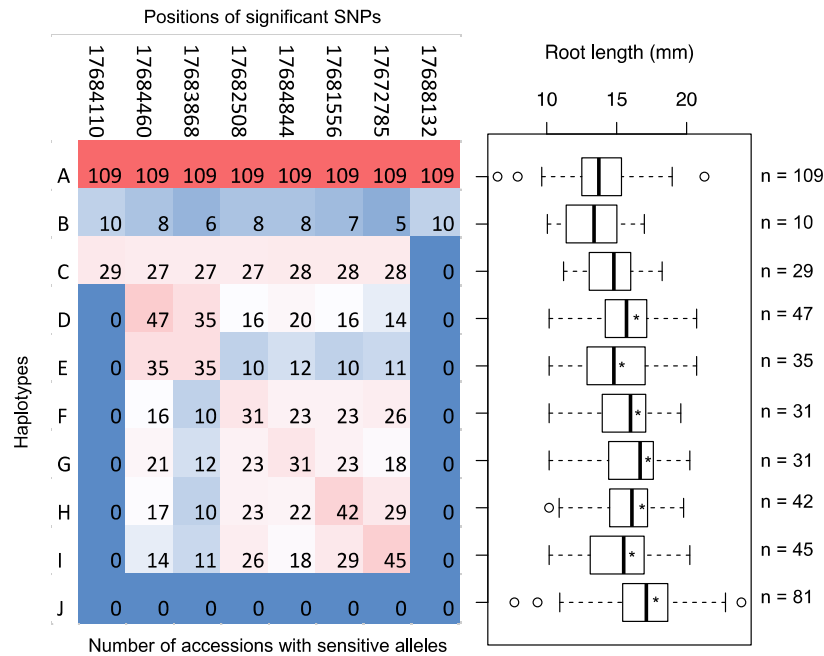

1  
2 **Supplementary Figure 5. Haplotype analysis of natural *GSNOR* variants.** Haplotype analysis (left  
3 panel) of the significant eight SNPs identified by GWAS at high Fe in Figure 1B and box plots (right  
4 panel) for root length in accessions that are grouped by different haplotypes. The heatmap shows the  
5 number of accessions with sensitive alleles (that were defined by shorter roots in Supplementary Figure  
6 3c) at different significant SNPs. Asterisk (\*) indicates the significant difference between haplotype A  
7 and other haplotypes by Student's *t*-test ( $p < 0.05$ ). The number (n) of accessions for each haplotype are  
8 shown in the figure. The source data are provided in a Source Data file.

9  
10

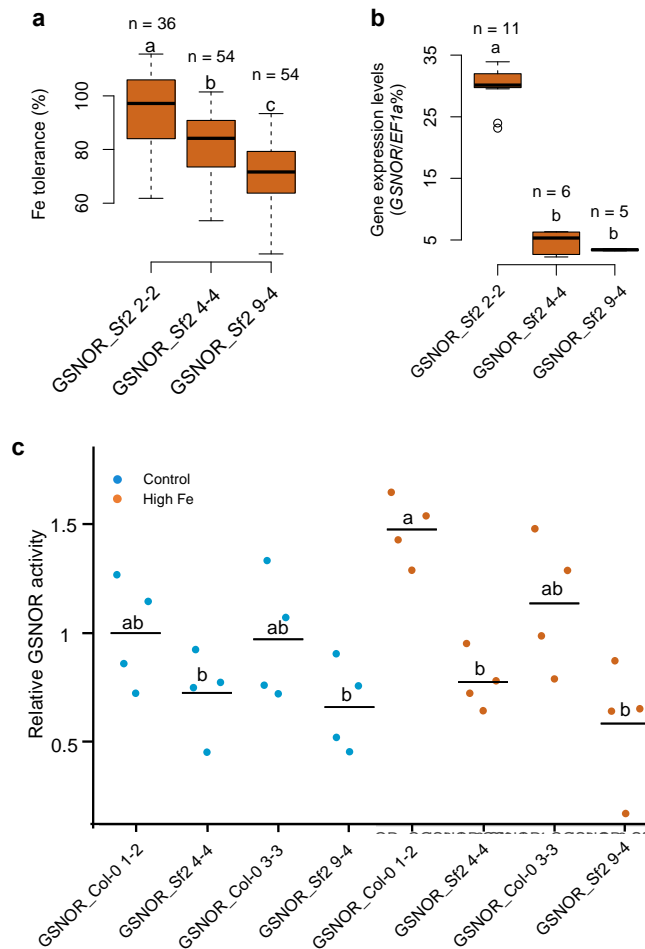

1  
2 **Supplementary Figure 6. Fe tolerance, transcript levels and enzyme activity of different GSNOR**  
3 **variants.** Box plots for root tolerance to high Fe (**a**) and *GSNOR* transcript levels (**b**) in T3 generation of  
4 different T-DNA lines of *GSNOR\_Sf-2* construct. Fe tolerance (%) is defined by normalizing the root  
5 length at high Fe ( $\frac{1}{2}$  MS with 350  $\mu$ M Fe) with the root length at control ( $\frac{1}{2}$  MS). n denotes the number of  
6 seedlings in (**a**) and the number of biological samples in (**b**). **c**, GSNOR activity in T3 generation of  
7 different T-DNA lines of *GSNOR\_Col-0* and *GSNOR\_Sf-2* constructs. The seedlings were grown on the  
8 control and high Fe for 8 days. The value is presented as the mean and dot plots (n = 4 biologically  
9 independent samples). Two-way ANOVA analysis suggested a significant difference of GSNOR activity  
10 between the different genotypes ( $p < 0.001$ ), but not for high Fe treatment and its interaction with the  
11 genotypes. Different letters indicated the significant difference at  $p$ -value  $< 0.05$  level by a two-way  
12 ANOVA analysis with Tukey's HSD test. The source data of Supplementary Figure 6a-c are provided in  
13 a Source Data file.

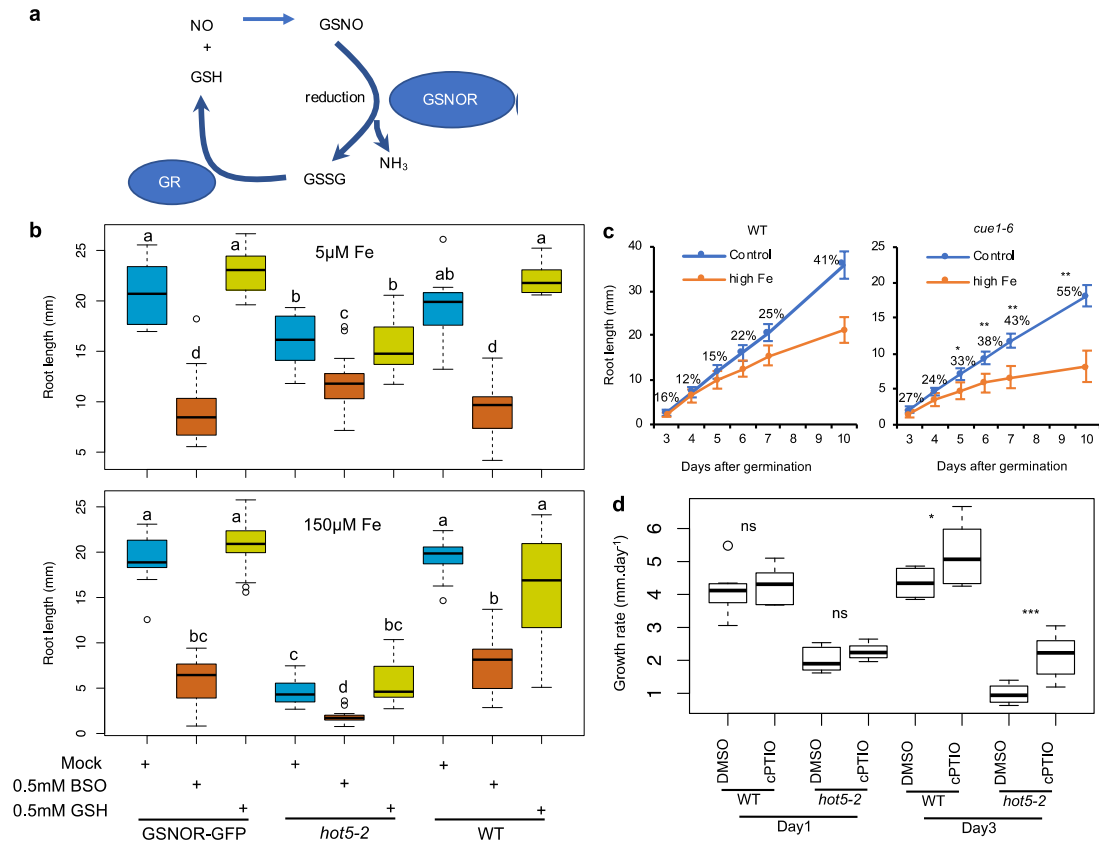

1  
2

3 **Supplementary Figure 7. High accumulation of nitric oxide causes root growth sensitivity to high**  
 4 **Fe in *gsnor* mutants.** **a**, Diagram of *GSNOR*'s involvement in nitric oxide (NO) metabolism. **b**, Box  
 5 plots for root length of WT, *hot5-2* and *pGSNOR:GSNOR-GFP* complemented *hot5-2* lines upon  
 6 glutathione (GSH), L-Buthionine-sulfoximine (BSO, an inhibitor of GSH synthesis), and Fe treatments 7  
 7 days after plating. Different letters indicate a significant difference according to two-way ANOVA with  
 8 Tukey's HSD test at  $p < 0.05$  level ( $n = 15$  biologically independent samples). **c**, Mean root growth of NO  
 9 overaccumulation mutant *cue1-6* and WT Col-0 in control and high Fe conditions. Error bars: standard  
 10 deviation.  $n = 18$  biologically independent samples. Asterisk \* and \*\* indicate significant differences of  
 11 the inhibition on the root growth by high Fe between Col-0 and *cue1-6* on a given day at  $p < 0.05$  and  $p$   
 12  $< 0.01$  respectively (Student's *t*-test). Percentage of root length at high Fe compared to the control for each  
 13 genotype is indicated in the figure. **d**, Box plots for root growth rate of *hot5-2* mutant at high Fe and  
 14 application of NO scavenger cPTIO. The 5-day-old seedlings grown in normal condition were transferred  
 15 to 150  $\mu$ M Fe with DMSO and 200  $\mu$ M cPTIO for 1 or 3 days. Asterisk \*\*\*, \* and ns indicated the  
 16 significant difference at  $p < 0.001$ , 0.05 and no significance (ns) according to Student's *t*-test ( $n = 8$   
 17 biologically independent samples). The Source data of Supplementary Figure 7b-d are provided in a  
 18 Source Data file.



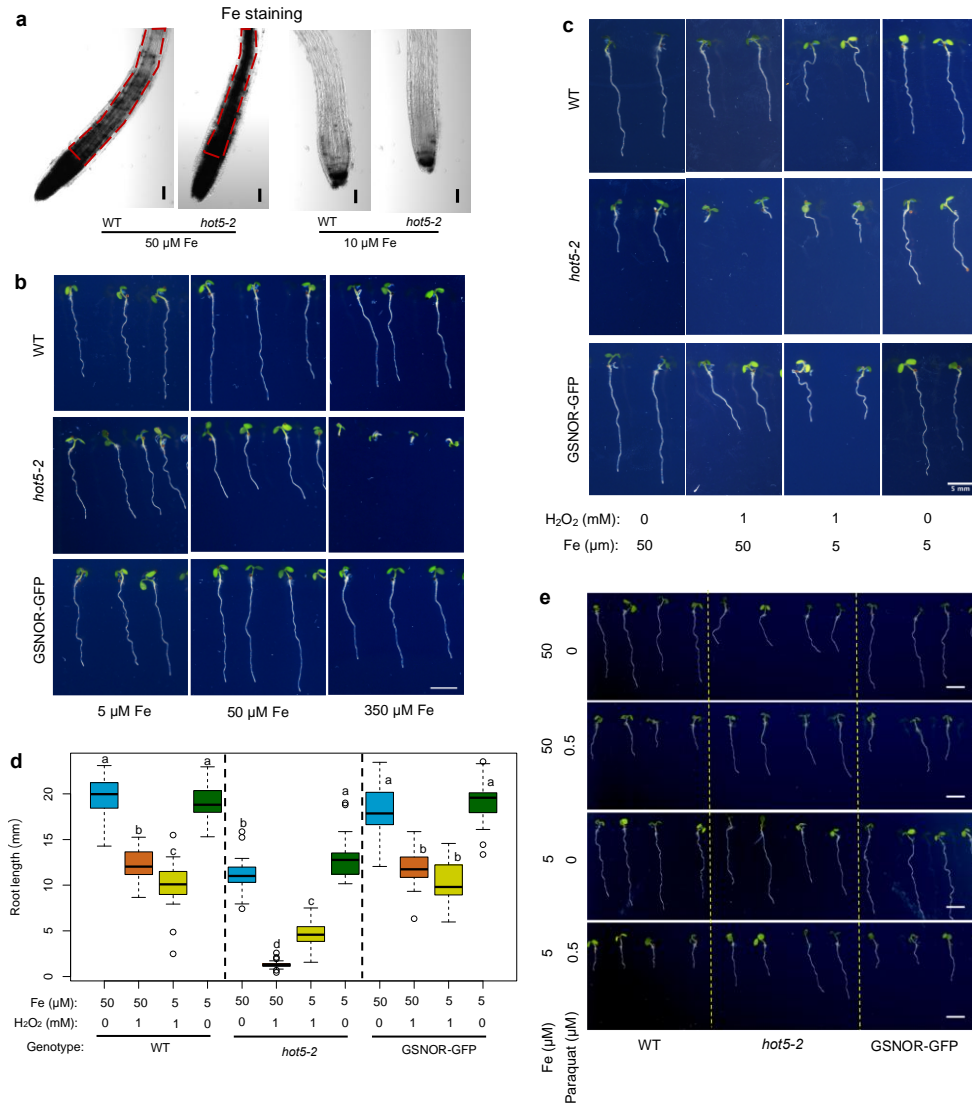

1  
2 **Supplementary Figure 8. *GSNOR* protects root growth from Fe-dependent oxidative stress but**  
3 **increases susceptibility to another oxidative stress inducer paraquat. a,** Perls/DAB staining of WT  
4 and *hot5-2* root tips at day 5 after germination at low Fe and control conditions. The area surrounded by  
5 red dash lines indicates the area of differential Fe accumulation in the root tips of wild-type and *hot5-2*. **b,**  
6 Root growth of WT, *hot5-2* and *pGSNOR:GSNOR-GFP* complemented *hot5-2* lines at different Fe  
7 concentrations at day 6 after germination. Scale bar: 5 mm. **c,** Root growth of WT, *hot5-2* and  
8 *pGSNOR:GSNOR-GFP* complemented *hot5-2* lines upon H<sub>2</sub>O<sub>2</sub> and Fe treatments 7 days after  
9 germination. **d,** Box plots for root length in experiments depicted in (c). n = 24 biologically independent  
10 samples. **e,** Representative seedlings of *gsnor* mutant line, the respective WT control and complemented  
11 lines at different concentrations of Fe and Paraquat at day 7 after germination. Scale bar: 50  $\mu$ m in (a); 5  
12 mm in (b, c, e). The source data of Supplementary Figure 8d are provided in a Source Data file.

13

1

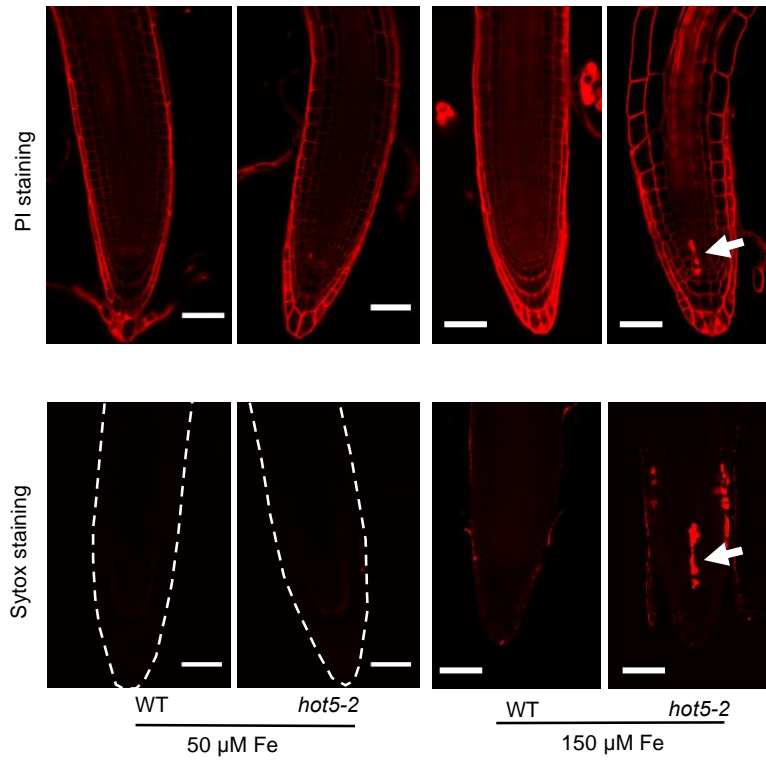

2

3 **Supplementary Figure 9. *GSNOR* suppresses Fe-induced cell death in root meristems.** Medial optical  
4 section of a representative root of *gsnor* mutant line and the respective WT control at 50 μM and 150 μM  
5 Fe at day 6 after germination using PI and Sytox Orange staining. The dotted lines outline the contour of  
6 the root tip. White arrow indicates areas of cell death. Scale bars: 50 μm.

7

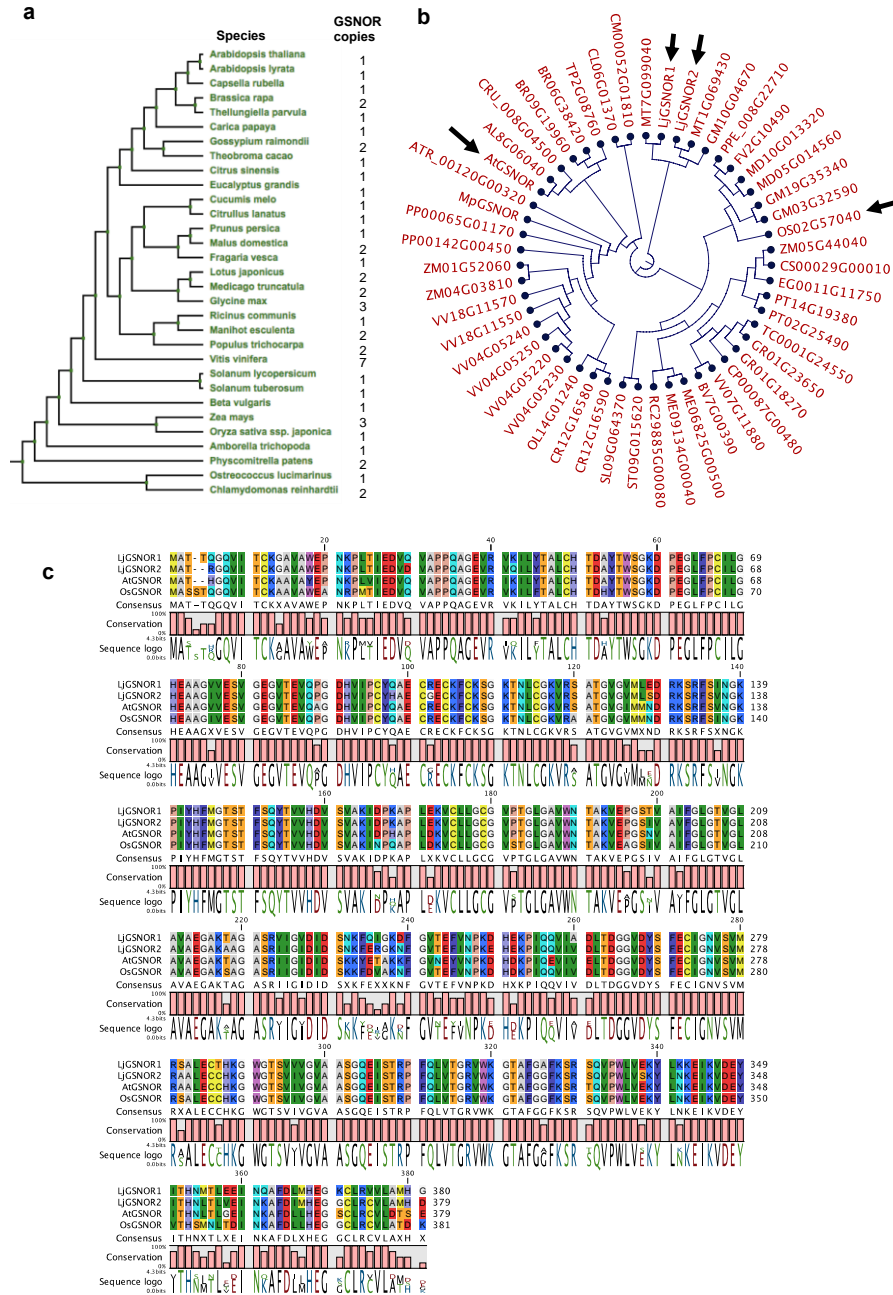

1  
 2 **Supplementary Figure 10. Phylogenetic analysis of *GSNOR* among different plant species.** a, Copy  
 3 number of *GSNOR* in 31 species. These 50 genes include 49 genes in subfamily *ORTHO03D001554* in 31  
 4 species and a second copy of *GSNOR* found in *Lotus japonicus*. The results were analyzed in Plaza\_V3  
 5 ([https://bioinformatics.psb.ugent.be/plaza/versions/plaza\\_v3\\_dicots/genes/view/AT5G43940](https://bioinformatics.psb.ugent.be/plaza/versions/plaza_v3_dicots/genes/view/AT5G43940)). b,  
 6 Phylogenetic analysis of 51 *GSNOR* genes including 50 genes from (a) and one from *Marchantia*  
 7 *polymorpha*. c, Alignment of *GSNOR* amino acid sequences from *Arabidopsis thaliana*, *Lotus japonicus*  
 8 and *Oryza sativa*.

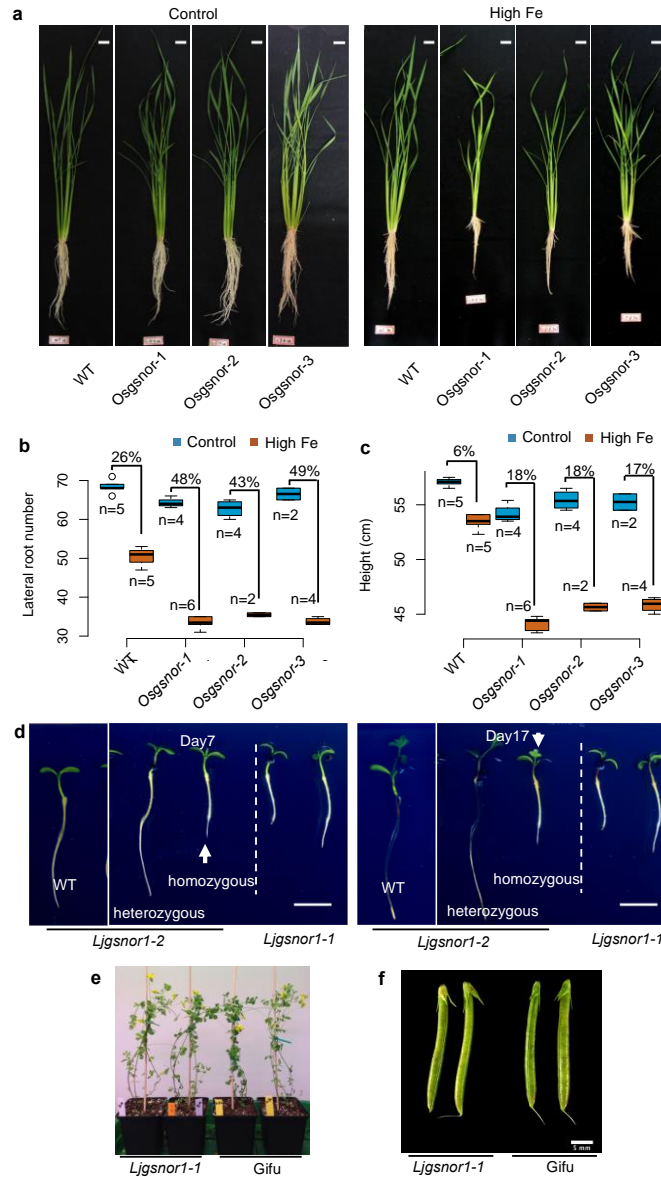

1  
2 **Supplementary Figure 11. Function of *GSNOR* in high Fe tolerance and development among**  
3 **different plant species. a**, Representative whole seedlings of three independent *OsGSNOR* knockout  
4 lines as shown in Fig. 7b. **b**, **c**, Box plots for the number of lateral roots and shoot height in three  
5 independent *OsGSNOR* knockout lines shown in (a). The number (n) of homozygous plants and % trait  
6 differences are indicated in figure. **d**, Seedling phenotypes of representative *Ljgsnor1-1*, *Ljgsnor1-2* and  
7 WT plants 7 and 17 days after germination (transfer to 350 $\mu$ M Fe occurred at day 3 after germination).  
8 Homozygous seedlings are indicated with white arrows. **e**, Mature shoot phenotypes of representative  
9 *Ljgsnor1-1*, *Ljgsnor1-2* and WT plants grown in the standard soils in green house for about 3 months. **f**,  
10 Silique phenotypes of *Ljgsnor1-1* and Gifu grown in standard soils. Scale bars: 2 cm in (a), 5 mm in (d  
11 and f). The source data of Supplementary Figure 11b and 11c are provided in a Source Data file.

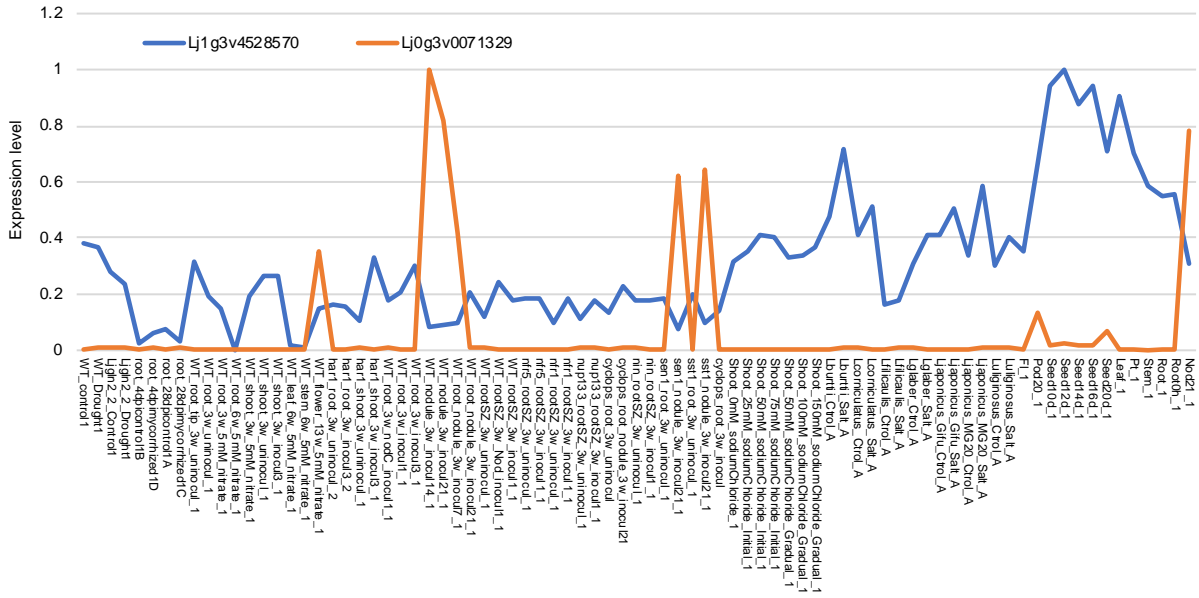

1  
 2 **Supplementary Figure 12. Gene expression patterns of *LjGSNOR1* and *LjGSNOR2*.** *LjGSNOR1*:  
 3 *Lj1g3v4528570*; *LjGSNOR2*: *Lj0g3v0071329*. The data was download from the LjGEA project (entire  
 4 LjGEA dataset by gene ID, normalized across condition / by row) (<https://lotus.au.dk/expat/>). The source  
 5 data are provided in a Source Data file.  
 6

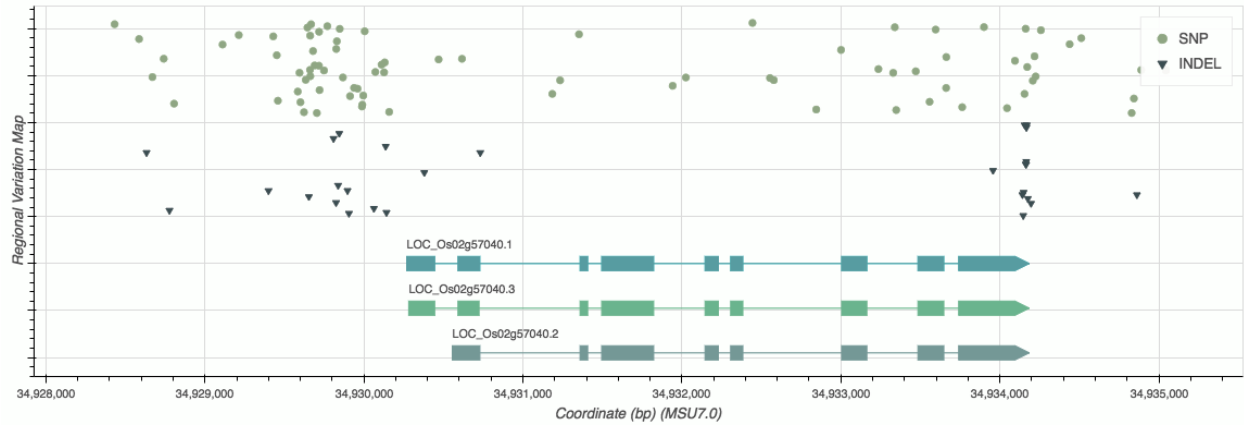

1  
 2 **Supplementary Figure 13. Natural variants of *GSNOR* in rice.** 112 variations including SNPs and  
 3 INDELs were found between 2.0 kb upstream and 1.0 kb downstream of this gene  
 4 (OS02G57040/LOC\_Os02g57040) from 4729 accessions using RiceVarMap  
 5 2.0([http://ricevarmap.ncpgr.cn/v2/vars\\_in\\_gene/](http://ricevarmap.ncpgr.cn/v2/vars_in_gene/)) using default parameters.  
 6

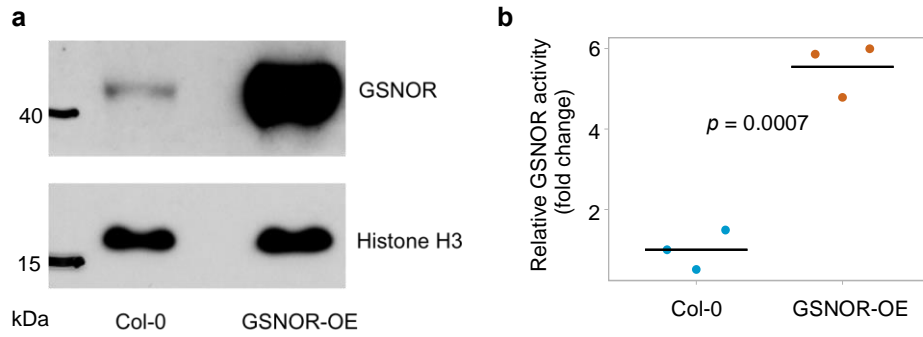

1  
2 **Supplementary Figure 14. GSNOR protein level and GSNOR activity in the 35S:GSNOR line. a,**  
3 Western blot analysis of GSNOR in the 7-day-old seedlings of Col-0 and 35S:GSNOR (*GSNOR-OE*) line.  
4 A histone H3 protein is shown as a loading control. **b,** GSNOR activity assay of GSNOR in the 8-day-old  
5 seedlings of Col-0 and *GSNOR-OE*. The mean and dot plots of relative GSNOR activity was shown (*n* =  
6 3 biologically independent samples). The seedlings were grown in ½ MS medium. *p*-value of student's *t*-  
7 test is shown. The source data are provided in a Source Data file.  
8

1

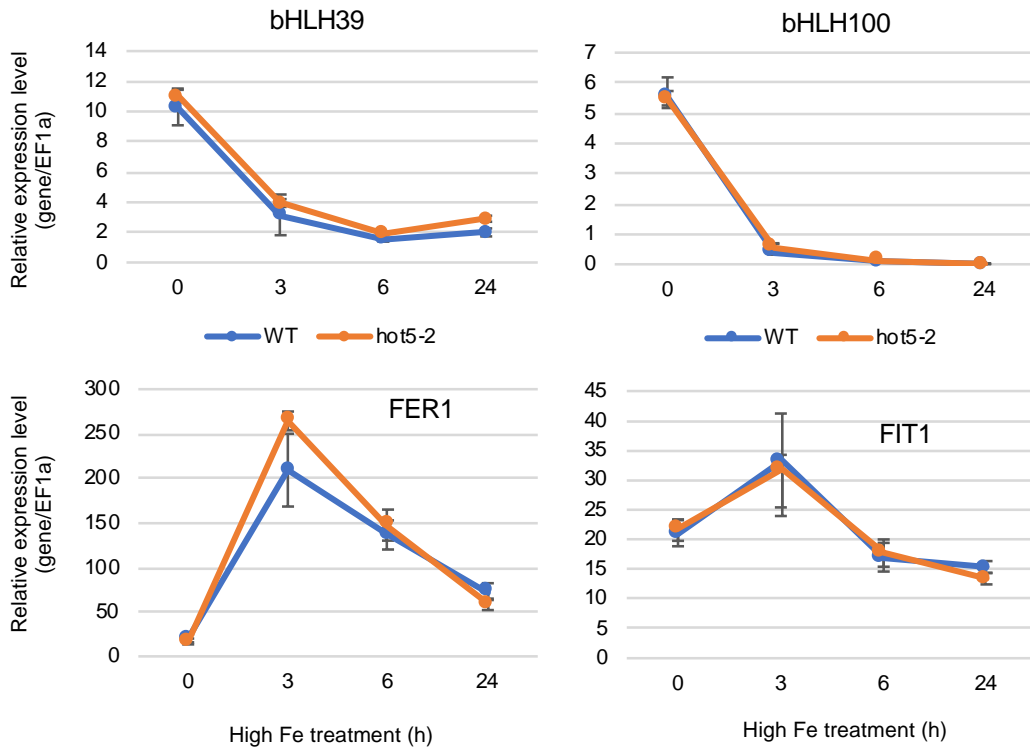

2

3 **Supplementary Figure 15. Expression patterns of Fe deficiency responsive and Fe binding/storage**  
4 **marker genes in Col-0 and *gsnor* mutant *hot5-2*.** Root samples were collected from seedlings grown in  
5 low Fe condition (1/2 MS containing 10  $\mu$ M Fe) for 6 days, and then transferred to high Fe (1/2 MS  
6 containing 350  $\mu$ M Fe) for 3 h, 6 h and 24 h. RNA was extracted from these samples for qPCR analysis.  
7 The expression value of each gene was normalized to the *EF1a* gene and shown as the mean  $\pm$  standard  
8 deviation (n = 6). Three biologically independent samples and two technical replicates for each sample  
9 were measured for each gene. The source data are provided in a Source Data file.



1 **Supplementary Table 1. Broad sense heritability estimated for variation of primary root length in**  
2 **319 *Arabidopsis* accessions grown in the control and high Fe conditions.**

3

| Broad sense Heritability | Day3  | Day4  | Day5  | Day6  | Day7  | Day8  | Day10 | Day13 |
|--------------------------|-------|-------|-------|-------|-------|-------|-------|-------|
| Control                  | 0.442 | 0.478 | 0.442 | 0.474 | 0.483 | 0.494 | 0.523 | 0.522 |
| High Fe                  | 0.411 | 0.428 | 0.443 | 0.46  | 0.463 | 0.492 | 0.492 | 0.478 |

4 The source data are provided as a Source Data file.

5

6

1 **Supplementary Table 2. List of primer sequences used in this study.**

| Primer ID       | Sequence 5'-3'                       | Purpose               |
|-----------------|--------------------------------------|-----------------------|
| GSNOR_Col_F     | GCTTGATATCGAATTTGATTGATGCTAAACCTCAG  | Cloning               |
| GSNOR_Col_R     | CGGGCTGCAGGAATTGTAACTATATGATTAGACATG | Cloning               |
| GSNOR_Sf2_F     | GCTTGATATCGAATTTGATTGATGCCAAACCTCAG  | Cloning               |
| GSNOR_Sf2_R     | CGGGCTGCAGGAATTGTAACTATATGATTAGACATG | Cloning               |
| 30033535_F      | CCCTGCAGCTTCATGGCCAAGGATA            | Genotyping            |
| 30033535_R      | TGTGTTGTGTTGTGGTGTCTCACTCTCA         | Genotyping            |
| 30060068_F      | TGCAACCACCCCAAAATGGAAAAGC            | Genotyping            |
| 30060068_R      | TGATCTCACCGATGGTGGGGTTGA             | Genotyping            |
| 30075087_F      | CAAGCCCAACAGTTCCAAGGCCAA             | Genotyping            |
| 30075087_R      | TGCGGTTGCGGGGAACACTTAAAA             | Genotyping            |
| OsGSNOR_sgRNA   | GCTGAGGGGGCAAATCAGC                  | CRISPR/Cas9           |
| Osgsnor-F       | ACATACCATTGCCTCGACA                  | Genotyping/sequencing |
| Osgsnor-R       | CCACCAGACATGGATTGCCT                 | Genotyping/sequencing |
| GSNOR_F         | TGGCACTGTTGGACTTGCTGTTG              | qPCR                  |
| GSNOR_R         | TGGCTTGCCTGATCCTTTGGG                | qPCR                  |
| EF1a_F          | CCTTGGTGTCAAGCAGATGA                 | qPCR                  |
| EF1a_R          | TGAAGACACCTCCTTGATGATTT              | qPCR                  |
| bHLH39_F        | TGCCTCTGGCCAATCGAAGAAG               | qPCR                  |
| bHLH39_R        | TGACTTCAAGCTTCGAGAAACCG              | qPCR                  |
| BHLH100_F       | CTTCCTCCCACCAATCAAACGAAG             | qPCR                  |
| BHLH100_R       | ACTTGCTCTTGCAGCTCTGGTATG             | qPCR                  |
| FIT1_F          | AGCTCTCCTTCTCCGGACACATAC             | qPCR                  |
| FIT1_R          | GCTCTGTTCTGAAGCATGTCCCATC            | qPCR                  |
| FER1_F          | CAACGTTGCTATGAAGGGACTAGC             | qPCR                  |
| FER1_R          | ACTCTTCCTCCTCTTTGGTTCTGG             | qPCR                  |
| GSNOR_SF-2_LP 2 | GGTCCCAGTCTAGCTACGT                  | Sequencing            |
| GSNOR_SF-2_LP 3 | CCTCGCACTCTCACTATCTGT                | Sequencing            |
| GSNOR_SF-2_LP 4 | ACAGGAGTTCAAGCTGGAGA                 | Sequencing            |
| GSNOR_SF-2_LP 5 | GTCCTTCTCTTCTTTCTTTGCGA              | Sequencing            |
| GSNOR_Col_RP1   | GTCGGGTCGGGTCGTTAATA                 | Sequencing            |
| GSNOR_Col_RP2   | AGGACACAGCCTCAAATTGA                 | Sequencing            |
| GSNOR_Col_RP3   | GGTGGCAATTCTTACCAGTGG                | Sequencing            |
| GSNOR_Col_RP4   | TGCCAATGATCCTTGAAGCAC                | Sequencing            |
| GSNOR_Col_RP5   | GCACTTGGGTTGACTCTTG                  | Sequencing            |

2
